# Supplementary material for: Self-engineered binary nanoassembly enabling closed-loop glutathione depletion-amplified tumor ferroptosis
Source: Royal Society of Chemistry journal article supplement (doi:10.1039/d3bm01153d), 2023-01-01
Supplement: d3bm01153d1.pdf [file d3bm01153d1.pdf]

## Supporting information

Title:

# Self-engineered Binary Nanoassembly Enabling Closed-loop Glutathione Depletion-amplified Tumor Ferroptosis

**Authors:** Jin Lei<sup>1,#</sup>, Shenwu Zhang<sup>1,#</sup>, Zehua Wu<sup>1</sup>, Xinxin Sun<sup>1</sup>, Binghong Zhou<sup>1</sup>, Peiqi Huang<sup>1</sup>, Mingzhu Fang<sup>1</sup>, Lin Li<sup>2\*</sup>, Cong Luo<sup>1\*</sup>, Zhonggui He<sup>1\*</sup>

## Affiliations:

<sup>1</sup>Department of Pharmaceutics, Wuya College of Innovation, Shenyang Pharmaceutical University, Shenyang 110016, PR China

<sup>2</sup>Department of Pharmacy, Women and Children's Hospital of Chongqing Medical University/Chongqing Health Center for Women and Children, Chongqing, 401147, China

<sup>#</sup>These authors contributed equally to this work.

## \*Corresponding authors:

Lin Li, Ph.D., Cong Luo, Ph.D. and Zhonggui He, Ph.D.

Department of Pharmaceutics, Wuya College of Innovation, Shenyang Pharmaceutical University, 103 Wenhua Road, Shenyang 110016, China

E-mail address: cqfyll@163.com; luocong@syphu.edu.cn; hezhonggui@vip.163.com

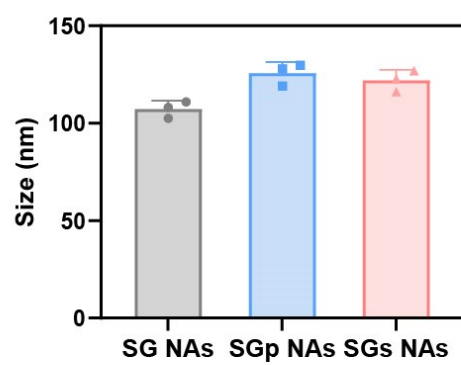

**Figure S1.** The DLS size of non-PEGylated and PEGylated NAs (n = 3).

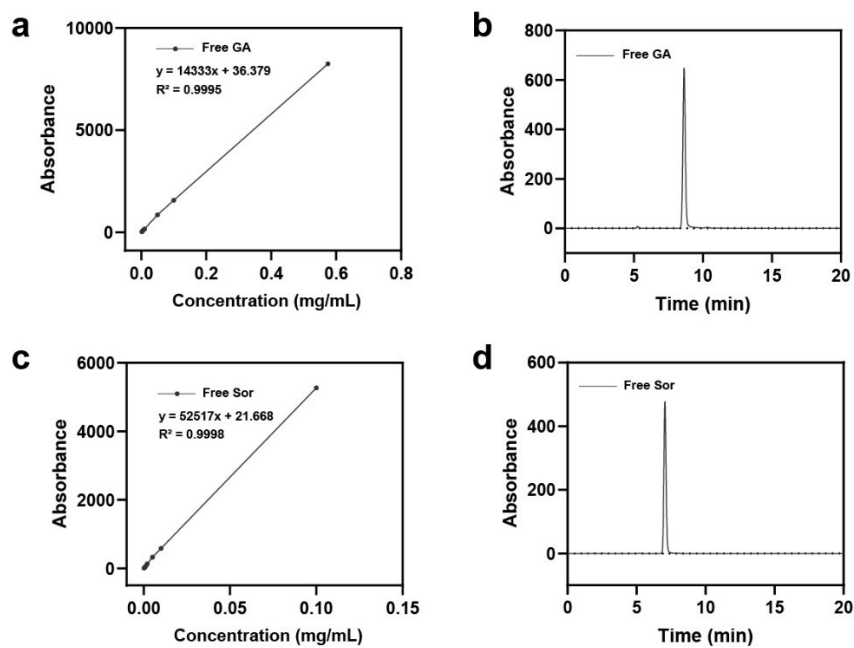

**Figure S2.** Standard curves and corresponding high performance liquid chromatography of free GA (a,b) and free Sor (c,d), respectively.

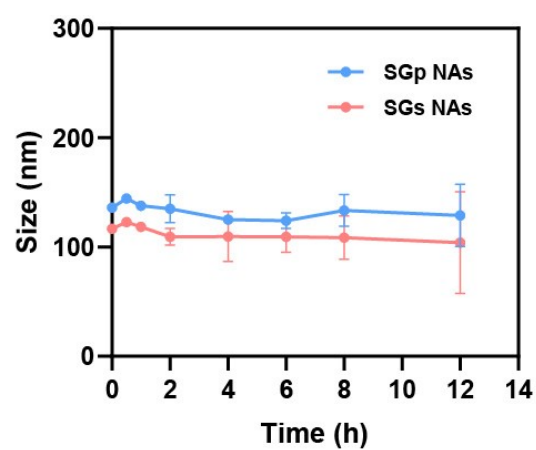

**Figure S3.** Colloidal stability of SGp NAs and SGs NAs incubated in PBS (pH 7.4) containing 10% serum (n = 3).

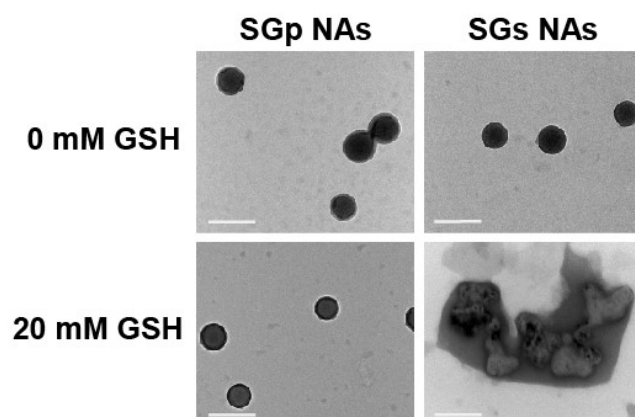

**Figure S4.** Particle size distribution of SGp NAs and SGs NAs in the presence of 0 mM and 20 mM GSH were obtained by TEM. Scale bar: 200 nm.

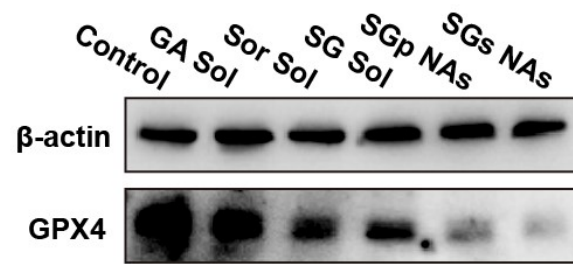

**Figure S5.** Western blotting analysis results of intracellular GPX4 protein in 4T1 cells after treatments.

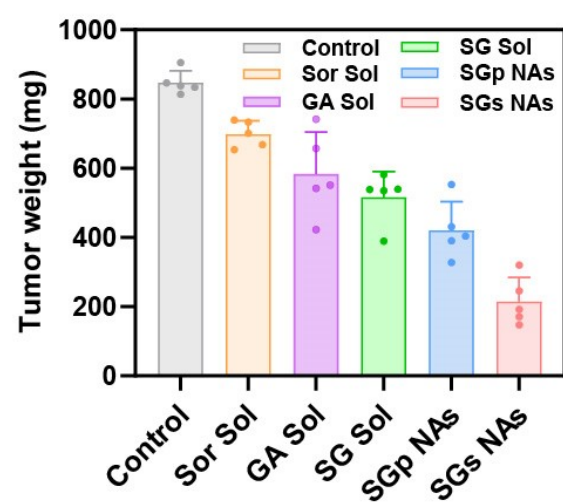

**Figure S6.** Tumor weight of the mice (n = 5)

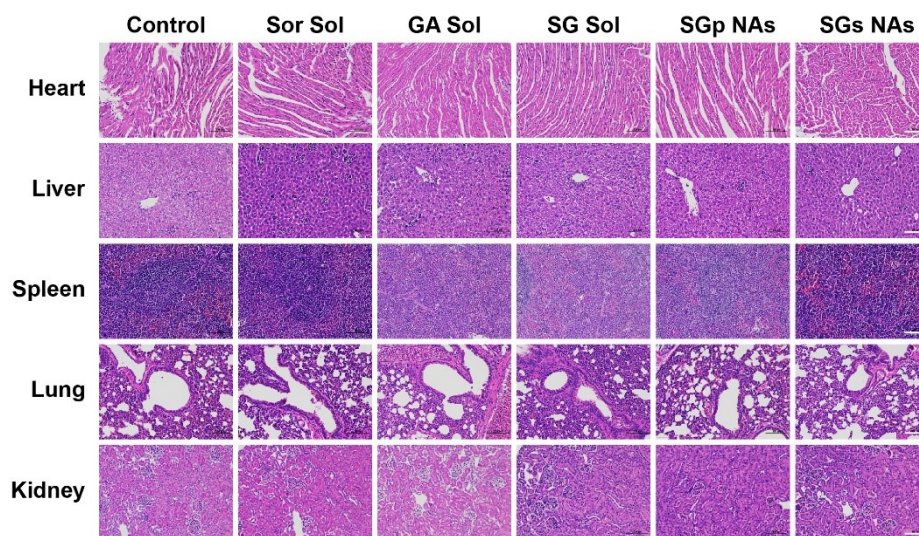

**Figure S7.** The H&E staining images of major organs after different treatments. Scale bar = 100  $\mu\text{m}$ .

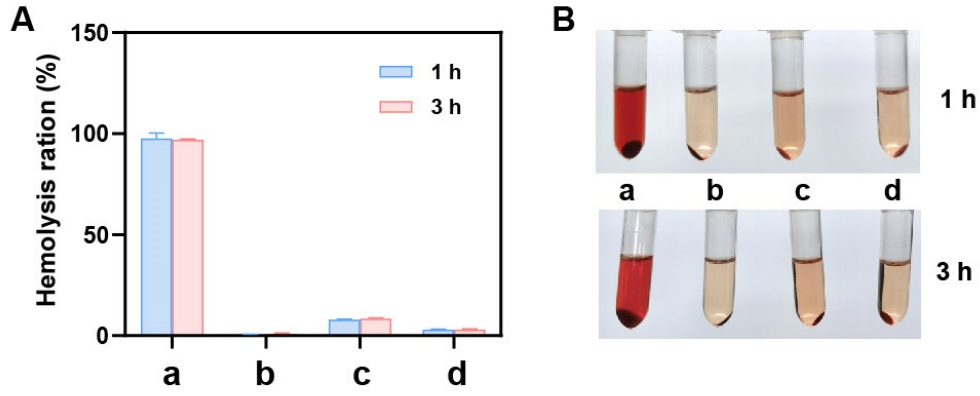

**Figure S8.** Hemolysis tests. (A) Hemolysis ratios of red blood cell solutions after incubating with a (water), b (saline solution), c (SGp NAs), and d (SGs NAs) for 1 h and 3 h, respectively. Saline solution and water were used as negative and positive controls, respectively (n = 3); (B) Photographs of centrifuged red blood cell solutions after various treatments for 1 h and 3 h.

**Table S1.** Particle sizes and PDI of Sor@GA NAs at various molar ratios (n=3).

| Sor:GA | Size (nm)     | PDI           |
|--------|---------------|---------------|
| 1:5    | 118.7 ± 1.058 | 0.099 ± 0.052 |
| 1:4    | 116.2 ± 1.872 | 0.088 ± 0.063 |
| 1:3    | 115.4 ± 1.473 | 0.069 ± 0.025 |
| 1:2    | 119.6 ± 3.235 | 0.181 ± 0.029 |
| 1:1    | 109.8 ± 4.062 | 0.073 ± 0.052 |
| 2:1    | 131.3 ± 2.723 | 0.087 ± 0.012 |
| 3:1    | 129.4 ± 5.002 | 0.069 ± 0.079 |
| 4:1    | 122.8 ± 3.404 | 0.055 ± 0.055 |
| 5:1    | 129.9 ± 0.289 | 0.067 ± 0.053 |

**Table S2.** Synergistic cytotoxicity of Sor@GA NAs at various molar ratios (n=3).

| Sor:GA | CI   |
|--------|------|
| 1:5    | 0.45 |
| 1:4    | 0.33 |
| 1:3    | 0.35 |
| 1:2    | 0.35 |
| 1:1    | 0.23 |
| 2:1    | 0.27 |
| 3:1    | 0.46 |
| 4:1    | 0.47 |
| 5:1    | 0.49 |

**Table S3.** Mean size, polydispersity index, and Zeta potential of SGp NAs and SGs NAs.

| Formulations | Size (nm)     | PDI           | Zeta potential (mV) |
|--------------|---------------|---------------|---------------------|
| SGp NAs      | 130.3 ± 1.768 | 0.106 ± 0.021 | -32.67 ± 0.478      |
| SGs NAs      | 114.4 ± 2.207 | 0.073 ± 0.018 | -32.43 ± 0.330      |

**Table S4.** IC<sub>50</sub> value of different formulations against 4T1 cells.

| Formulations | IC <sub>50</sub> (nM) |
|--------------|-----------------------|
| Sor Sol      | 161.7 ± 56.27         |
| GA Sol       | 70.18 ± 22.70         |
| SG Sol       | 31.67 ± 9.155         |
| SGp NAs      | 20.50 ± 5.343         |
| SGs NAs      | 13.03 ± 1.039         |

**Table S5.** Pharmacokinetic parameters after various treatments (n = 6).

| Formulations | $t_{1/2}$ (h)     | $AUC_{0-24\text{ h}}$ ( $\mu\text{g}\cdot\text{h}/\text{mL}$ ) | $C_{\text{max}}$ ( $\mu\text{g}/\text{mL}$ ) | MRT (h)           |
|--------------|-------------------|----------------------------------------------------------------|----------------------------------------------|-------------------|
| Cy7 Sol      | $0.451 \pm 0.256$ | $535.212 \pm 324.809$                                          | $1094.17 \pm 251.236$                        | $0.439 \pm 0.164$ |
| SGp-Cy7 NAs  | $3.483 \pm 0.669$ | $2458.857 \pm 1158.726$                                        | $1484.176 \pm 2255.113$                      | $2.895 \pm 0.752$ |
| SGs-Cy7 NAs  | $2.738 \pm 0.525$ | $2650.222 \pm 911.425$                                         | $1399.499 \pm 291.189$                       | $2.914 \pm 0.500$ |
